# Supplementary material
Source: publisher figshare collection journal article supplement (https://sage.figshare.com/ndownloader/files/20186352)
Supplement: Supplementary file 1 [file 20186352]

Appendix 1: Electronic Case Report Form ‘patient and care characteristics’

**Patient characteristics:**

| Variable name                     | Type of variable:           | Categories:                                                                                                                                                           |
|-----------------------------------|-----------------------------|-----------------------------------------------------------------------------------------------------------------------------------------------------------------------|
| Gender                            | Nominal                     | <ul style="list-style-type: none"> <li>- Male</li> <li>- Female</li> </ul>                                                                                            |
| Age                               | Ratio                       | N/A                                                                                                                                                                   |
| Marital status                    | Nominal                     | <ul style="list-style-type: none"> <li>- Single, never married</li> <li>- Married or domestic partnership</li> <li>- Widowed</li> <li>- Divorced/Separated</li> </ul> |
| Location of admission             | Open, quantified to nominal | N/A                                                                                                                                                                   |
| Living situation before admission | Open, quantified to nominal | N/A                                                                                                                                                                   |
| Residence before admission        | Open, quantified to nominal | N/A                                                                                                                                                                   |
| Length of hospice stay            | Ratio                       | N/A                                                                                                                                                                   |

**Characteristics of the illness:**

| Variable:                             | Type of variable            | Categories:                                                                                                                                             |
|---------------------------------------|-----------------------------|---------------------------------------------------------------------------------------------------------------------------------------------------------|
| Person initiating admission           | Open, quantified to nominal | N/A                                                                                                                                                     |
| Initiating professional for admission | Nominal                     | <ul style="list-style-type: none"> <li>- General Practitioner</li> <li>- Specialized palliative cancer care nurse</li> <li>- Community nurse</li> </ul> |

|                             |         |                                                                                                                                                                                                                                                                                                                                                                                 |
|-----------------------------|---------|---------------------------------------------------------------------------------------------------------------------------------------------------------------------------------------------------------------------------------------------------------------------------------------------------------------------------------------------------------------------------------|
|                             |         | <ul style="list-style-type: none"> <li>- Medical specialist</li> <li>- Specialist geriatric medicine</li> </ul> <p>Otherwise, namely</p>                                                                                                                                                                                                                                        |
| Elective or acute admission | Nominal | <ul style="list-style-type: none"> <li>- Elective</li> <li>- Acute</li> </ul>                                                                                                                                                                                                                                                                                                   |
| Goal of admission           | Nominal | <ul style="list-style-type: none"> <li>- Last resort</li> <li>- Respite care</li> <li>- Symptom analysis</li> <li>- Crisis care</li> <li>- Unknown</li> </ul> <p>Otherwise, namely</p>                                                                                                                                                                                          |
| Reasons for admission       | Nominal | <ul style="list-style-type: none"> <li>- Physical symptoms and burdens</li> <li>- Psychological: cognitive</li> <li>- Psychological: emotional</li> <li>- Behavioural problems</li> <li>- Social problems</li> <li>- (threatening) overcharge personal caregiver</li> <li>- Spiritual problems</li> <li>- Preferred location of passing</li> <li>- Otherwise, namely</li> </ul> |
| Reason for discharge        | Nominal | <ul style="list-style-type: none"> <li>- Deceased</li> <li>- Discharge to home</li> <li>- Transfer/admission to another organization or department</li> <li>- End of support issue</li> </ul>                                                                                                                                                                                   |
| Use of end-of-life care:    | Nominal | <ul style="list-style-type: none"> <li>- Palliative sedation during moment of passing</li> <li>- Acute sedation (e.g. massive bleeding or choking)</li> <li>- Euthanasia</li> <li>- Choose consciously to stop eating/drinking</li> </ul>                                                                                                                                       |

|                                                |                             |                                                                                                                                                                                                                                                                                                                        |
|------------------------------------------------|-----------------------------|------------------------------------------------------------------------------------------------------------------------------------------------------------------------------------------------------------------------------------------------------------------------------------------------------------------------|
|                                                |                             | Other, namely                                                                                                                                                                                                                                                                                                          |
| Patient passed away during admission           | Nominal                     | <ul style="list-style-type: none"> <li>- Yes</li> <li>- No</li> <li>- Unknown</li> </ul>                                                                                                                                                                                                                               |
| Preferred location of passing during admission | Nominal                     | <ul style="list-style-type: none"> <li>- Home</li> <li>- Hospice</li> <li>- Hospital</li> <li>- Nursing home</li> <li>- Elderly home</li> <li>- At family/friends</li> <li>- Patients and/or closest ones are unable to speak about this</li> <li>- Unknown</li> <li>- Other, namely</li> </ul>                        |
| Changed preferred location of passing          | Nominal                     | <ul style="list-style-type: none"> <li>- Yes</li> <li>- No</li> <li>- Unknown</li> </ul>                                                                                                                                                                                                                               |
| Main diagnoses                                 | Open, quantified to nominal | N/A                                                                                                                                                                                                                                                                                                                    |
| Location primary tumour                        | Nominal                     | <ul style="list-style-type: none"> <li>- Digestive system</li> <li>- Respiration intrathoracally</li> <li>- Female genitals</li> <li>- Mamma</li> <li>- Kidneys and urinary tract</li> <li>- Hematology</li> <li>- Male genitals</li> <li>- Skin</li> <li>- Brain/central nervous system</li> <li>- Unknown</li> </ul> |

|                             |                                   |                                                                                                                                                                                                                                                                                                                        |
|-----------------------------|-----------------------------------|------------------------------------------------------------------------------------------------------------------------------------------------------------------------------------------------------------------------------------------------------------------------------------------------------------------------|
|                             |                                   | <ul style="list-style-type: none"> <li>- Other, namely</li> </ul>                                                                                                                                                                                                                                                      |
| Metastases found?           | Nominal                           | <ul style="list-style-type: none"> <li>- No, no metastases</li> <li>- Liver</li> <li>- Lungs</li> <li>- Pleura</li> <li>- Bone</li> <li>- Peritoneum</li> <li>- Skin</li> <li>- Meninges</li> <li>- Brain</li> <li>- Adrenal</li> <li>- Lymph nodes</li> <li>- Other, namely</li> </ul>                                |
| <b>Physiscal dimension:</b> |                                   |                                                                                                                                                                                                                                                                                                                        |
| Case of organ failure       | Open,<br>quantified to<br>nominal | N/A                                                                                                                                                                                                                                                                                                                    |
| Neurological problems       | Open,<br>quantified to<br>nominal | N/A                                                                                                                                                                                                                                                                                                                    |
| Other physical problems     | Open,<br>quantified to<br>nominal | N/A                                                                                                                                                                                                                                                                                                                    |
| Co-morbiditiesmorbidityies  | Nominal                           | <ul style="list-style-type: none"> <li>- Other malignity</li> <li>- Lung disease</li> <li>- Heart and vascular disease</li> <li>- Gastrointestinal tract</li> <li>- Urinary tract and reproductive organs</li> <li>- Muscles, connective tissue and joints</li> <li>- Central and peripheral nervous system</li> </ul> |

|                                                             |                             |                                                                                                                                                                                                                                                                                                           |
|-------------------------------------------------------------|-----------------------------|-----------------------------------------------------------------------------------------------------------------------------------------------------------------------------------------------------------------------------------------------------------------------------------------------------------|
|                                                             |                             | <ul style="list-style-type: none"> <li>- Metabolism and clotting disorders</li> <li>- Infectious diseases</li> </ul>                                                                                                                                                                                      |
| <b>Psychological dimension:</b>                             |                             |                                                                                                                                                                                                                                                                                                           |
| Orientation in person, place and time                       | Nominal                     | <ul style="list-style-type: none"> <li>- Yes</li> <li>- No</li> <li>- Unknown</li> </ul>                                                                                                                                                                                                                  |
| Memory problems                                             | Nominal                     | <ul style="list-style-type: none"> <li>- Yes <ul style="list-style-type: none"> <li>• Short term memory</li> <li>• Long term memory</li> <li>• Unknown</li> <li>• Other, namely</li> </ul> </li> <li>No</li> </ul>                                                                                        |
| <b>Social dimension:</b>                                    |                             |                                                                                                                                                                                                                                                                                                           |
| Patients worries about influence of illness on closest ones | Open, quantified to nominal |                                                                                                                                                                                                                                                                                                           |
| Experienced support by closest ones                         | Nominal                     | <ul style="list-style-type: none"> <li>- Yes</li> <li>- No</li> <li>- Unknown</li> </ul>                                                                                                                                                                                                                  |
| <b>Spiritual dimension:</b>                                 |                             |                                                                                                                                                                                                                                                                                                           |
| Support from religion                                       | Nominal                     | <ul style="list-style-type: none"> <li>- Yes <ul style="list-style-type: none"> <li>• Catholic</li> <li>• Reformed (in Dutch: Hervormd)</li> <li>• Reformed (in Dutch: Gereformeerd)</li> <li>• Protestant</li> <li>• Islam</li> <li>• Jewish</li> <li>• Hindu</li> <li>• Buddhist</li> </ul> </li> </ul> |

|                                                                                                 |                             |                                                                                                                                                                                                                                                                                |
|-------------------------------------------------------------------------------------------------|-----------------------------|--------------------------------------------------------------------------------------------------------------------------------------------------------------------------------------------------------------------------------------------------------------------------------|
|                                                                                                 |                             | <ul style="list-style-type: none"> <li>• Humanistic</li> <li>• Other, namely</li> </ul> <p>- No</p>                                                                                                                                                                            |
| <b>Other information:</b>                                                                       |                             |                                                                                                                                                                                                                                                                                |
| Number of days from admission until markedmarked palliative phase                               | Ratio                       | N/A                                                                                                                                                                                                                                                                            |
| Transition to palliative phase is discussed with patient                                        | Nominal                     | <ul style="list-style-type: none"> <li>- Yes</li> <li>- No</li> <li>- Unknown</li> </ul>                                                                                                                                                                                       |
| Life expectancy at admittance                                                                   | Open, quantified to nominal | N/A                                                                                                                                                                                                                                                                            |
| Stage of illness at admission                                                                   | Nominal                     | <ul style="list-style-type: none"> <li>- Mainly disease-targetedpalliation</li> <li>- Mainly symptom-targeted- palliation</li> <li>- Terminal palliation</li> <li>- Doubting</li> <li>- Unknown</li> </ul>                                                                     |
| Which disease-targeted therapy has been deployed in the past three months?                      | Open, quantified to nominal | N/A                                                                                                                                                                                                                                                                            |
| Problems during admission that had an influence on the care process (Multiple answers possible) | Nominal                     | <ul style="list-style-type: none"> <li>- Infection</li> <li>- Bleeding</li> <li>- Anaemia</li> <li>- Oedema</li> <li>- Bronchopulmonary insufficiency</li> <li>- Pleural fluid</li> <li>- Ascites</li> <li>- Sub ileus/ passing problems</li> <li>- Urine retention</li> </ul> |

|  |  |                                                                                                                                                                                                                                                                                                                                              |
|--|--|----------------------------------------------------------------------------------------------------------------------------------------------------------------------------------------------------------------------------------------------------------------------------------------------------------------------------------------------|
|  |  | <ul style="list-style-type: none"> <li>- Renal insufficiency</li> <li>- Icterus</li> <li>- Stomatitis</li> <li>- Cachexia</li> <li>- Pressure ulcers</li> <li>- Wound</li> <li>- Reduced awareness</li> <li>- Delirium</li> <li>- Coping</li> <li>- Lack of social contacts</li> <li>- Extreme suffering</li> <li>- Other, namely</li> </ul> |
|--|--|----------------------------------------------------------------------------------------------------------------------------------------------------------------------------------------------------------------------------------------------------------------------------------------------------------------------------------------------|

#### **Experienced symptoms:**

Experienced symptoms were operationalized with the four-dimensional Utrecht Symptom Diary (USD-4D).

#### **Indication for and deploying of (non-)pharmacological interventions:**

Deployed (non-)pharmacological interventions were collected as an open variable. This variable was later categorised and quantified as nominal. Indications of interventions were collected as open.

#### **Assessment tools used:**

AssessmentA tools used were collected as an open variable. This variable was later categorized and quantified as nominal.

Appendix 2: Description of patient and illness characteristics.

| Information about                     | N (%)       | Information about                                  | N (%)   |
|---------------------------------------|-------------|----------------------------------------------------|---------|
| <b><u>Patient characteristics</u></b> |             | <b><u>Continuation illness characteristics</u></b> |         |
| Gender                                |             | ~ <b>problems during admission</b>                 |         |
| Male                                  | 44 (42)     | Existential suffering                              | 11 (11) |
| Age (years)                           | 73 (15..4)* | Urine retention                                    | 11 (11) |
| Marital status                        |             | Infection                                          | 8 (8)   |
| Married/registered partnership        | 43 (41)     | Bleeding                                           | 5 (5)   |
| Widowed                               | 21 (30)     | Wounds                                             | 3 (3)   |
| Single, never married                 | 17 (16)     | Coping                                             | 3 (3)   |
| Divorced                              | 12 (12)     | Anemia                                             | 3 (3)   |
| Living situation before admission     |             | Cachexia                                           | 2 (2)   |
| Single                                | 47 (45)     | Lack of social contacts                            | 2 (2)   |
| Living together                       | 32 (31)     | Ascites                                            | 2 (2)   |
| Living in Institution                 | 5 (5)       | Pleural fluid                                      | 1 (1)   |
| Missing                               | 20 (19)     | Other                                              | 34 (33) |
| Residence before admission            |             |                                                    |         |
| Home                                  | 38 (37)     | <b>Admission</b>                                   |         |
| Hospital                              | 53 (51)     | Initiating person                                  |         |
| Nursing/elderly home                  | 8 (8)       | Patient/family                                     | 53 (51) |
| Living at family                      | 2 (2)       | Missing                                            | 30 (29) |
| Missing                               | 3 (4..2)    | Initiating professional                            |         |
| Length of hospice stay (days)         | 20          |                                                    |         |
|                                       | (47..5)**   | General practitioner                               | 13 (13) |
|                                       |             | Medical specialist                                 | 8 (8)   |
|                                       |             | District Nurse                                     | 1 (1)   |
|                                       |             | Specialist elderly care                            | 1 (1)   |
|                                       |             | Missing                                            | 67 (64) |
|                                       |             | Other                                              | 14 (14) |
|                                       |             | Goal of admission                                  |         |
| <b><u>Illness characteristics</u></b> |             |                                                    |         |
| <b>Illness</b>                        |             |                                                    |         |
| Main diagnoses                        |             |                                                    |         |
| Cancer - Location primary tumor       |             |                                                    |         |
| Digestive system                      | 25 (24)     |                                                    |         |



|                                |         |                                             |            |
|--------------------------------|---------|---------------------------------------------|------------|
| Respiration intrathoracally    | 24 (23) | Last resort                                 | 100 (96)   |
| Kidneys and urinary tract      | 6 (6)   | Respite care                                | 2 (2)      |
| Female genitals                | 6 (6)   | Crisis care                                 | 1 (1)      |
| Brain/central nervous system   | 6 (6)   | Unknown                                     | 2 (2)      |
| Mamma                          | 5 (5)   | Other                                       | 1 (1)      |
| Unknown/Space-occupying lesion | 3 (3)   | Reasons for admission                       |            |
| Hematology                     | 2 (2)   | Physical symptoms and burdens               | 82 (79)    |
| Male genitals                  | 2 (2)   | Preferred location of passing               | 17 (16)    |
| Mouth                          | 2 (2)   | Social problems                             | 16 (15)    |
|                                |         | (Threatening) overcharge personal caregiver | 14 (14)    |
| Skin                           | 1 (1)   | Psychological: cognitive                    | 11 (11)    |
| Organ failure                  |         | Psychological: emotional                    | 3 (3)      |
| Heart failure                  | 8 (8)   | Spiritual problems                          | 2 (2)      |
| Lung failure                   | 2 (2)   | Other                                       | 14 (14)    |
| Neurological problems          |         | <b>Transition to palliative phase</b>       |            |
| ALS                            | 1 (1)   | Date transition to palliative phase in days | 27 (157)** |
| CVA                            | 1 (1)   | Discussed transition to palliative phase    | 65 (63)    |
| Other physical problems***     | 10 (10) | Life expectancy                             |            |
| Cancer - Metastases            |         | < 3 months                                  | 66 (64)    |
| No metastases                  | 37 (36) | < 1 month                                   | 6 (6)      |
| Liver                          | 24 (23) | ≥ 3 months                                  | 5 (5)      |
| Lungs                          | 21 (20) | < 1 week                                    | 4 (4)      |
| Bone                           | 20 (19) | Unknown                                     | 23 (22)    |
| Lymph nodes                    | 15 (14) | Stage of the illness                        |            |
| Brain                          | 9 (9)   | Mainly symptom-targeted palliation          | 89 (86)    |
| Peritoneum                     | 7 (7)   | Terminal palliation                         | 8 (8)      |
| Adrenal                        | 5 (5)   | Unknown                                     | 4 (4)      |
| Pleura                         | 5 (5)   | Mainly disease-targeted palliation          | 2 (2)      |
| Skin                           | 3 (3)   | Doubting                                    | 1 (1)      |
| Meninges                       | 1 (1)   |                                             |            |

|                                       |         |                                          |          |
|---------------------------------------|---------|------------------------------------------|----------|
| Other                                 | 11 (11) | Disease-targeted therapy                 |          |
| Actual co-morbidity's                 |         | Chemotherapy                             | 13 (13)  |
| Heart and vascular disease            | 50 (48) | Medicamental                             | 12 (12)  |
| Metabolism and clotting disorders     | 29 (28) | Radiotherapy                             | 9 (9)    |
| Lung disease                          | 18 (17) | Surgery                                  | 4 (4)    |
| Urinary tract and reproductive organs | 18 (17) | Immunotherapy                            | 1 (1)    |
| Muscles, connective tissue and joints | 12 (12) | Other                                    | 4 (4)    |
| Central/peripheral nervous system     | 10 (10) |                                          |          |
| Other malignity                       | 8 (8)   | <b>Dying</b>                             |          |
| Gastrointestinal tract                | 5 (5)   | Reasons dismissal                        |          |
| Infection diseases                    | 2 (2)   | Passed away                              | 103 (99) |
| None                                  | 11 (11) | Use of end-of-life-care                  |          |
|                                       |         | Palliative sedation (structural use of a |          |
| Other                                 | 32 (31) | sedative)                                | 52 (50)  |
|                                       |         | Euthanasia                               | 5 (5)    |
| <b>Multidimensionality</b>            |         | Acute sedation                           | 1 (1)    |
| Orientation in time, place, person    | 57 (55) | Missing                                  | 8 (8)    |
| Memory problems                       | 25 (24) | Other                                    | 37 (36)  |
| Support from closest ones             | 44 (42) | Preferred location of dying              |          |
| Support religion                      | 38 (37) | Hospice                                  | 65 (63)  |
| Patient worries                       | 14 (14) | Home                                     | 2 (2)    |
| <b>Problems during admission</b>      |         | Unspeakable for patient/closest ones     | 2 (2)    |
| Delirium                              | 30 (29) | Unknown                                  | 35 (34)  |
| Pressure ulcers                       | 24 (23) | Changed preferred location of dying      |          |
| Edema                                 | 19 (18) | No                                       | 20 (19)  |
| Sub ileus/passing problems            | 16 (15) | Yes                                      | 2 (2)    |
| Reduced awareness                     | 16 (15) | Missing                                  | 3 (3)    |
| Bronchopulmonary insufficiency        | 16 (15) | Unknown                                  | 79 (76)  |

Percentages are rounded and therefore may not add up to 100.

\* Mean (SD) \*\* Median (IQR), due to not normal distribution \*\*\*As primary problem.
